# Psychiatric Services

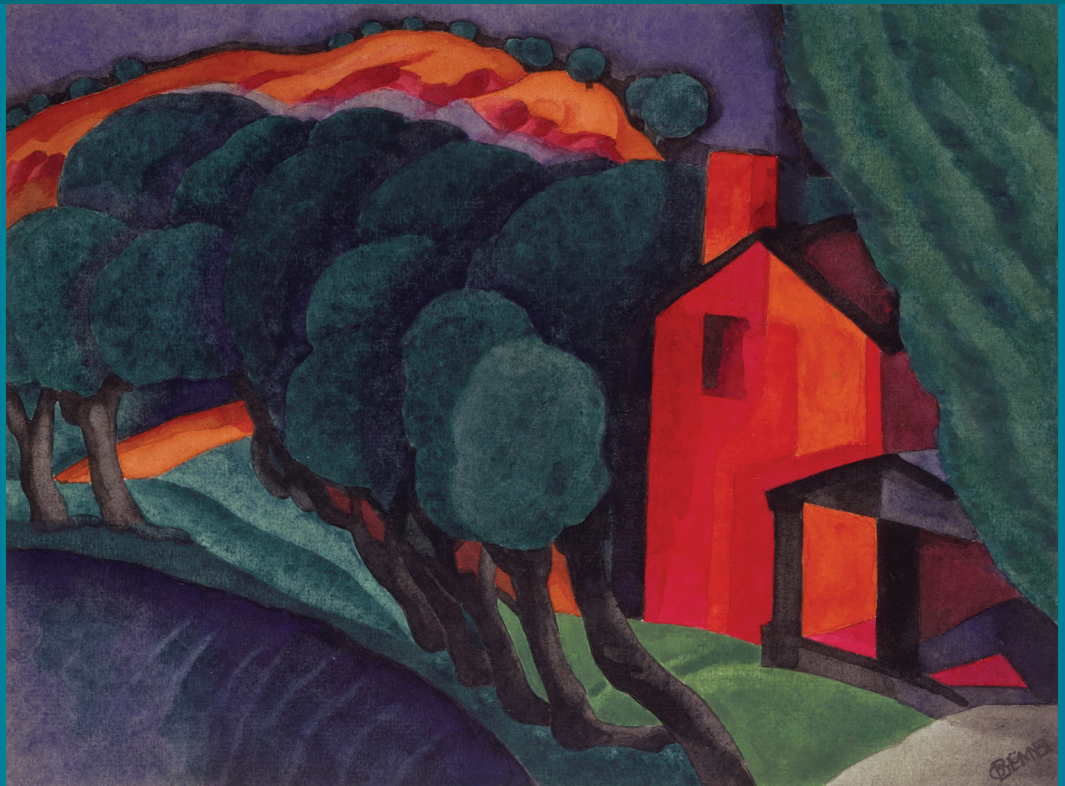

Costs of sustaining EBPs at community mental health agencies  
RCT on targeted training to manage diabetes and serious mental illness  
Survey of child psychiatrists on monitoring use of SGAs  
Putting provider networks to the test: availability of psychiatrists
